# Supplementary material
Source: HighWire-hosted journal article supplement (https://www.annfammed.org/highwire/filestream/7445/field_highwire_adjunct_files/0/Ferrer_Supp_Apps.pdf)
Supplement: Ferrer_Supp_Apps.pdf [file Ferrer_Supp_Apps.pdf]

**Online Supplementary Material**

Ferrer RL, Mody-Bailey P, Jaén CR, Gott S, Araujo S. A medical assistant–based program to promote healthy behaviors in primary care. *Ann Fam Med.* 2009;7(6):504-512.

<http://www.annfammed.org/cgi/content/full/7/6/504/DC1>

**Supplemental Table 1. Prevalence of Individual Risk Behaviors and Risk Behavior Clusters in the Entire Study Sample (N = 864)**

| <b>Variable</b>                                                                              | <b>Prevalence, % (95% CI)</b> |
|----------------------------------------------------------------------------------------------|-------------------------------|
| <b>Risk behavior</b>                                                                         |                               |
| Smoking                                                                                      | 44.8 (41.4-48.2)              |
| Risky drinking                                                                               | 20.4 (17.8-23.3)              |
| Unhealthy diet                                                                               | 92.1 (90.1-93.8)              |
| Low physical activity                                                                        | 26.8 (23.9-29.9)              |
| <b>Risk behavior clusters</b>                                                                |                               |
| None                                                                                         | 3.3 (2.3-4.8)                 |
| 1 risk                                                                                       | 33.8 (30.6-37.1)              |
| Smoking only                                                                                 | 1.9 (1.1-3.0)                 |
| Risky drinking only                                                                          | 0.1 (0.0-0.6)                 |
| Unhealthy diet only                                                                          | 30.0 (26.9-33.2)              |
| Low physical activity only                                                                   | 1.9 (1.1-3.0)                 |
| 2 risks                                                                                      | 40.7 (37.4-44.1)              |
| Smoking, risky drinking                                                                      | 0.3 (0.0-1.0)                 |
| Smoking, unhealthy diet                                                                      | 21.4 (18.7-24.3)              |
| Smoking, low physical activity                                                               | 0.3 (0.0-1.0)                 |
| Risky drinking, unhealthy diet                                                               | 5.1 (3.7-6.8)                 |
| Risky drinking, low physical activity                                                        | 0.0 (0.0-0.4)                 |
| Unhealthy diet, low physical activity                                                        | 13.5 (11.3-16.0)              |
| 3 risks                                                                                      | 19.4 (16.9-22.2)              |
| Smoking, drinking, diet                                                                      | 11.0 (9.0-13.3)               |
| Smoking, drinking, physical activity                                                         | 0.0 (0.0-0.4)                 |
| Drinking, diet, physical activity                                                            | 1.3 (0.6-2.3)                 |
| Smoking, diet, physical activity                                                             | 7.2 (5.5-9.1)                 |
| All 4 risks                                                                                  | 2.7 (0.2-4.0)                 |
| Note: Estimates in this table are calculated using imputed data as described in the Methods. |                               |

## Online Supplementary Data

<http://www.annfammed.org/cgi/content/full/7/6/504/DC1>

**Supplemental Table 2. Intervention Chosen by Patients With Multiple Behavioral Risks in the Intervention Arm**

| Risk Cluster                                | Intervention Chosen n (%) |         |                |           |                       |
|---------------------------------------------|---------------------------|---------|----------------|-----------|-----------------------|
|                                             | No.                       | Smoking | Risky Drinking | Poor Diet | Low Physical Activity |
| Smoking, risky drinking                     | 1                         | 1 (100) | 0 (0)          | –         | –                     |
| Smoking, unhealthy diet                     | 82                        | 63 (77) | –              | 5 (6)     | –                     |
| Smoking, low physical activity              | 1                         | 1 (100) | –              | –         | 0                     |
| Risky drinking, unhealthy diet              | 18                        | –       | 1 (6)          | 9 (50)    | –                     |
| Risky drinking, low physical activity       | 0                         | –       | –              | –         | –                     |
| Unhealthy diet, low physical activity       | 29                        | –       | –              | 7 (24)    | 22 (76)               |
| Smoking, drinking, unhealthy diet           | 31                        | 25 (81) | 2 (6)          | 2 (6)     | –                     |
| Smoking, drinking, low physical activity    | 0                         | –       | –              | –         | –                     |
| Risky drinking, diet, low physical activity | 0                         | –       | –              | –         | –                     |
| Smoking, diet, low physical activity        | 25                        | 21 (84) | –              | 0 (0)     | 4 (16)                |
| All 4                                       | 6                         | 6 (100) | 0 (0)          | 0 (0)     | 0 (0)                 |
| Total                                       | 193                       | 117     | 3              | 23        | 26                    |

Note: Percentages sum across rows. Not all rows sum to 100% because some participants crossed over to a nonprotocol intervention (24 patients; all of whom had dietary risk but chose physical activity instead of diet intervention).

# Online Supplementary Data

<http://www.annfammed.org/cgi/content/full/7/6/504/DC1>

**Supplemental Figure 1. Adoption of intervention by medical assistants at 6 primary care clinics.**

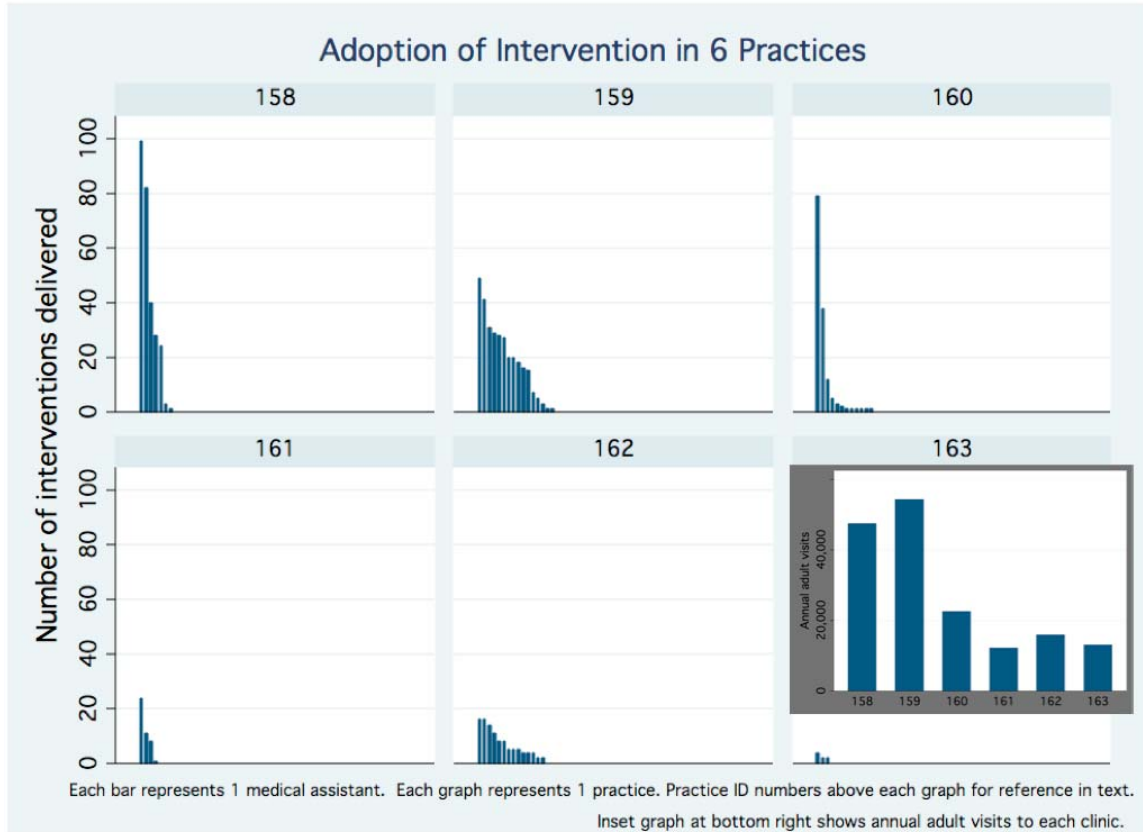

## Online Supplementary Data

<http://www.annfammed.org/cgi/content/full/7/6/504/DC1>

**Supplemental Table 3. Themes and Illustrative Quotations From Interviews With 15 Medical Assistants**

| Theme                                                                  | Illustrative Quotation                                                                                                                                                                                                                                               |
|------------------------------------------------------------------------|----------------------------------------------------------------------------------------------------------------------------------------------------------------------------------------------------------------------------------------------------------------------|
| Pressure to keep patient flow moving                                   | "...the doctors are haranguing us because they want their patients in their room and so we're having to hurry trying to get these questions answered."                                                                                                               |
| Extra workload was a challenge                                         | "It wasn't really complicated. It was mainly the extra work that it was."                                                                                                                                                                                            |
| Unease with delivering health messages at odds with their own behavior | "I find it hard to preach about losing weight when I'm sitting there and I'm 80 pounds overweight."                                                                                                                                                                  |
| Medical assistants felt hindered by their organizations                | "I'm not gonna be able to change how they are. It has to be a team effort, and I could tell you, there is no team effort in this clinic. They're trying to make it a team, but I think it's gonna be very difficult because we haven't been a team for a long time." |
| Helping patients change could be personally satisfying                 | "... when he came back he said, "Thank you so much, you really helped me out." And that was it so it made me feel good because I helped him out. He stopped smoking, he really stopped smoking. He just needed a little push."                                       |
| Confidence in their ability to relate to patients                      | "Because a lot of times, patients won't open up to the doctor like they will, you know, to me or a sheet of paper."                                                                                                                                                  |
